# Supplementary material for: Synthesis, characterization and properties of nitrogen-rich compounds based on cyanuric acid: a promising design in the development of new energetic materials
Source: Royal Society of Chemistry journal article supplement (doi:10.1039/c5ta10688e), 2016-01-01
Supplement: c5ta10688e1.pdf [file c5ta10688e1.pdf]

## Supplementary Information

### **Synthesis, Characterization and Properties of Nitrogen-rich compound based on Cyanuric Acid: A Promising Design in the Development of New Energetic Materials**

**Qiangqiang Liu<sup>a,b</sup>, Bo Jin<sup>b\*</sup>, Rufang Peng<sup>ab\*</sup>, Zhicheng Guo<sup>c</sup>, Jun Zhao<sup>b</sup>, Qingchun Zhang<sup>b</sup>, Yu Shang<sup>b</sup>**

<sup>a</sup> Research Center of Laser Fusion, China Academy of Engineering Physics, Mianyang, 621010, China

<sup>b</sup> State Key Laboratory Cultivation Base for Nonmetal Composites and Functional Materials, Southwest University of Science and Technology,  
Mianyang 621010, China

<sup>c</sup>School of Nation Defence Science and Technology, Southwest University of Science and Technology, Mianyang 621010, China

## Table of Contents

|                                                                                                                  |     |
|------------------------------------------------------------------------------------------------------------------|-----|
| Table S1 Atomic coordinates and equivalent isotropic displacement parameters for <b>2</b> .....                  | S3  |
| Table S2 Bond lengths and angles for <b>2</b> .....                                                              | S4  |
| Table S3 Anisotropic displacement parameters for <b>2</b> .....                                                  | S5  |
| Table S4 Hydrogen coordinates and isotropic displacement parameters for <b>2</b> .....                           | S5  |
| Table S5 Torsion angles for <b>2</b> .....                                                                       | S5  |
| Table S6 Hydrogen bonds for <b>2</b> .....                                                                       | S6  |
| Table S7 Atomic coordinates and $B_{iso}/B_{eq}$ for <b>4</b> .....                                              | S7  |
| Table S8 Atomic coordinates and $B_{iso}$ involving hydrogen atoms for <b>4</b> .....                            | S8  |
| Table S9 Anisotropic displacement parameters for <b>4</b> .....                                                  | S9  |
| Table S10 Bond lengths for <b>4</b> .....                                                                        | S10 |
| Table S11 Bond angles for <b>4</b> .....                                                                         | S11 |
| Table S12 Torsion Angles for <b>4</b> .....                                                                      | S12 |
| Table S13 Hydrogen bonds for <b>4</b> .....                                                                      | S13 |
| Table S14 Atomic coordinates and equivalent isotropic displacement parameters for <b>9·H<sub>2</sub>O</b> .....  | S14 |
| Table S15 Bond lengths and angles for <b>9·H<sub>2</sub>O</b> .....                                              | S15 |
| Table S16 Anisotropic displacement parameters for <b>9·H<sub>2</sub>O</b> .....                                  | S16 |
| Table S17 Hydrogen coordinates and isotropic displacement parameters for <b>9·H<sub>2</sub>O</b> .....           | S16 |
| Table S18 Torsion angles for <b>9·H<sub>2</sub>O</b> .....                                                       | S17 |
| Table S19 Hydrogen bonds for <b>9·H<sub>2</sub>O</b> .....                                                       | S17 |
| Table S20 Crystal data and structure refinement for <b>CA·H<sub>2</sub>O</b> .....                               | S18 |
| Table S21 Atomic coordinates and equivalent isotropic displacement parameters for <b>CA·H<sub>2</sub>O</b> ..... | S19 |
| Table S22 Bond lengths and angles for <b>CA·H<sub>2</sub>O</b> .....                                             | S19 |
| Table S22 Anisotropic displacement parameters for <b>CA·H<sub>2</sub>O</b> .....                                 | S20 |
| Table S23 Hydrogen coordinates and isotropic displacement parameters for <b>CA·H<sub>2</sub>O</b> .....          | S20 |
| Table S24 Torsion angles for <b>CA·H<sub>2</sub>O</b> .....                                                      | S20 |
| Computational Details(Isodesmic Reactions).....                                                                  | S21 |
| Fig. S2 <sup>13</sup> C NMR spectra of salt <b>1</b> .....                                                       | S22 |
| Fig. S3 <sup>13</sup> C NMR spectra of salt <b>6</b> .....                                                       | S22 |

**Table S1.** Atomic coordinates ( $\times 10^4$ ) and equivalent isotropic displacement parameters ( $\text{\AA}^2 \times 10^3$ ) for **2**.  $U(\text{eq})$  is defined as one third of the trace of the orthogonalized  $U_{ij}$  tensor.

|      | x       | y       | z       | U(eq) |
|------|---------|---------|---------|-------|
| O(1) | 3478(1) | 7297(1) | 3846(1) | 14(1) |
| O(2) | 5505(1) | 1613(1) | 2610(1) | 15(1) |
| O(3) | 1831(1) | 1313(1) | 4996(1) | 13(1) |
| N(1) | 2568(1) | 4373(1) | 4456(1) | 11(1) |
| N(2) | 4487(1) | 4477(1) | 3212(1) | 11(1) |
| N(3) | 3715(1) | 1449(1) | 3878(1) | 10(1) |
| C(1) | 3491(1) | 5454(1) | 3852(1) | 10(1) |
| C(2) | 4629(1) | 2456(1) | 3197(1) | 10(1) |
| C(3) | 2663(1) | 2378(1) | 4464(1) | 9(1)  |
| N(4) | 6058(1) | 7528(1) | 536(1)  | 12(1) |
| N(5) | 6303(1) | 7416(1) | 2070(1) | 13(1) |

**Table S2.** Bond lengths [Å] and angles [°] for **2**.

---

|                  |            |
|------------------|------------|
| O(1)-C(1)        | 1.2388(12) |
| O(2)-C(2)        | 1.2306(11) |
| O(3)-C(3)        | 1.2477(11) |
| N(1)-C(3)        | 1.3437(12) |
| N(1)-C(1)        | 1.3528(11) |
| N(2)-C(2)        | 1.3657(12) |
| N(2)-C(1)        | 1.3903(11) |
| N(2)-H(2)        | 0.924(14)  |
| N(3)-C(2)        | 1.3651(11) |
| N(3)-C(3)        | 1.3872(11) |
| N(3)-H(3)        | 0.882(16)  |
| N(4)-N(5)        | 1.4573(11) |
| N(4)-H(4A)       | 0.904(14)  |
| N(4)-H(4B)       | 0.910(14)  |
| N(4)-H(4C)       | 0.931(14)  |
| N(5)-H(5A)       | 0.870(14)  |
| N(5)-H(5B)       | 0.886(13)  |
|                  |            |
| C(3)-N(1)-C(1)   | 119.37(7)  |
| C(2)-N(2)-C(1)   | 123.44(7)  |
| C(2)-N(2)-H(2)   | 120.2(9)   |
| C(1)-N(2)-H(2)   | 116.3(9)   |
| C(2)-N(3)-C(3)   | 123.19(8)  |
| C(2)-N(3)-H(3)   | 118.5(7)   |
| C(3)-N(3)-H(3)   | 118.0(7)   |
| O(1)-C(1)-N(1)   | 122.18(8)  |
| O(1)-C(1)-N(2)   | 118.46(8)  |
| N(1)-C(1)-N(2)   | 119.35(8)  |
| O(2)-C(2)-N(3)   | 122.82(8)  |
| O(2)-C(2)-N(2)   | 122.64(8)  |
| N(3)-C(2)-N(2)   | 114.53(7)  |
| O(3)-C(3)-N(1)   | 121.90(8)  |
| O(3)-C(3)-N(3)   | 118.16(8)  |
| N(1)-C(3)-N(3)   | 119.94(7)  |
| N(5)-N(4)-H(4A)  | 108.3(8)   |
| N(5)-N(4)-H(4B)  | 108.0(8)   |
| H(4A)-N(4)-H(4B) | 107.7(11)  |
| N(5)-N(4)-H(4C)  | 112.7(8)   |
| H(4A)-N(4)-H(4C) | 111.2(11)  |
| H(4B)-N(4)-H(4C) | 108.9(12)  |
| N(4)-N(5)-H(5A)  | 104.7(8)   |
| N(4)-N(5)-H(5B)  | 105.6(9)   |
| H(5A)-N(5)-H(5B) | 106.4(12)  |

---

**Table S3.** Anisotropic displacement parameters ( $\text{\AA}^2 \times 10^3$ ) for **2**. The anisotropic displacement factor exponent takes the form:  $-2 \pi^2 [h^2 a^{*2} U^{11} + \dots + 2 h k a^* b^* U^{12}]$

|      | U11   | U22   | U33   | U23   | U13   | U12   |
|------|-------|-------|-------|-------|-------|-------|
| O(1) | 18(1) | 7(1)  | 17(1) | 0(1)  | 4(1)  | 0(1)  |
| O(2) | 14(1) | 12(1) | 21(1) | -2(1) | 10(1) | 0(1)  |
| O(3) | 12(1) | 10(1) | 17(1) | 1(1)  | 6(1)  | -1(1) |
| N(1) | 12(1) | 8(1)  | 13(1) | -1(1) | 4(1)  | 1(1)  |
| N(2) | 11(1) | 8(1)  | 13(1) | 1(1)  | 5(1)  | -1(1) |
| N(3) | 11(1) | 6(1)  | 14(1) | 0(1)  | 4(1)  | 0(1)  |
| C(1) | 10(1) | 9(1)  | 9(1)  | 0(1)  | 0(1)  | 0(1)  |
| C(2) | 10(1) | 10(1) | 11(1) | -1(1) | 1(1)  | 0(1)  |
| C(3) | 8(1)  | 11(1) | 9(1)  | 0(1)  | 1(1)  | 0(1)  |
| N(4) | 12(1) | 9(1)  | 14(1) | 0(1)  | 6(1)  | 0(1)  |
| N(5) | 14(1) | 12(1) | 13(1) | 0(1)  | 5(1)  | 1(1)  |

**Table S4.** Hydrogen coordinates ( $\times 10^4$ ) and isotropic displacement parameters ( $\text{\AA}^2 \times 10^3$ ) for **2**.

|       | x        | y        | z        | U(eq) |
|-------|----------|----------|----------|-------|
| H(4A) | 5099(16) | 7426(19) | 196(13)  | 20(3) |
| H(4B) | 6491(14) | 6460(20) | 220(14)  | 21(3) |
| H(5A) | 6010(14) | 8560(20) | 2330(13) | 19(3) |
| H(3)  | 3732(12) | 140(20)  | 3870(12) | 21(3) |
| H(5B) | 7252(15) | 7399(19) | 2357(14) | 20(3) |
| H(4C) | 6431(14) | 8680(20) | 217(14)  | 23(3) |
| H(2)  | 5099(14) | 5280(20) | 2820(13) | 29(3) |

**Table S5.** Torsion angles [ $^\circ$ ] for **2**.

|                     |            |
|---------------------|------------|
| C(3)-N(1)-C(1)-O(1) | -178.08(7) |
| C(3)-N(1)-C(1)-N(2) | 2.08(11)   |
| C(2)-N(2)-C(1)-O(1) | 177.76(7)  |
| C(2)-N(2)-C(1)-N(1) | -2.40(11)  |
| C(3)-N(3)-C(2)-O(2) | -175.73(8) |
| C(3)-N(3)-C(2)-N(2) | 3.95(11)   |
| C(1)-N(2)-C(2)-O(2) | 179.09(7)  |
| C(1)-N(2)-C(2)-N(3) | -0.60(11)  |
| C(1)-N(1)-C(3)-O(3) | -179.41(7) |
| C(1)-N(1)-C(3)-N(3) | 1.11(11)   |
| C(2)-N(3)-C(3)-O(3) | 176.13(7)  |
| C(2)-N(3)-C(3)-N(1) | -4.38(11)  |

**Table S6.** Hydrogen bonds for **2** [ $\text{\AA}$  and  $^\circ$ ].

| D-H...A             | d(D-H)    | d(H...A)  | d(D...A)   | $\angle$ (DHA) |
|---------------------|-----------|-----------|------------|----------------|
| N(2)-H(2)...N(5)    | 0.924(14) | 2.053(15) | 2.9696(11) | 171.1(13)      |
| N(4)-H(4C)...N(1)#1 | 0.931(14) | 1.928(14) | 2.8389(11) | 165.6(12)      |
| N(5)-H(5B)...O(2)#2 | 0.886(13) | 2.181(14) | 3.0228(11) | 158.5(12)      |
| N(3)-H(3)...O(1)#3  | 0.882(16) | 1.924(16) | 2.7996(11) | 171.9(11)      |
| N(5)-H(5A)...O(2)#4 | 0.870(14) | 2.137(14) | 2.9924(11) | 167.4(12)      |
| N(4)-H(4B)...O(3)#5 | 0.910(14) | 1.910(14) | 2.7609(11) | 155.0(12)      |
| N(4)-H(4A)...O(3)#6 | 0.904(14) | 1.948(14) | 2.8003(11) | 156.6(12)      |

Symmetry transformations used to generate equivalent atoms:

#1  $x+1/2, -y+3/2, z-1/2$  #2  $-x+3/2, y+1/2, -z+1/2$  #3  $x, y-1, z$  #4  $x, y+1, z$  #5  $x+1/2, -y+1/2, z-1/2$  #6  $-x+1/2, y+1/2, -z+1/2$

**Table S7.** Atomic coordinates and  $B_{iso}/B_{eq}$  for **4**.

|     | x            | y          | z          | $B_{eq}$  |
|-----|--------------|------------|------------|-----------|
| O1  | 0.34016(9)   | 0.73676(5) | 0.87607(5) | 1.097(8)  |
| O2  | 0.21415(10)  | 1.09977(5) | 1.06416(5) | 1.343(9)  |
| O3  | 0.28497(9)   | 1.09993(5) | 0.67724(5) | 1.147(8)  |
| O4  | 0.30419(10)  | 0.80462(5) | 0.56675(5) | 1.236(9)  |
| O5  | 0.21310(10)  | 1.16821(5) | 0.36898(5) | 1.403(9)  |
| O6  | 0.24595(9)   | 0.80740(5) | 0.18952(5) | 1.090(8)  |
| N1  | 0.25025(10)  | 1.10938(5) | 0.87078(5) | 0.966(9)  |
| N2  | 0.27421(10)  | 0.91860(5) | 0.97146(5) | 0.916(9)  |
| N3  | 0.30553(10)  | 0.91903(5) | 0.77596(5) | 0.916(9)  |
| N4  | 0.25472(10)  | 0.98629(5) | 0.46999(5) | 0.880(8)  |
| N5  | 0.22361(10)  | 0.98826(5) | 0.27868(5) | 0.898(8)  |
| N6  | 0.26704(9)   | 0.79702(5) | 0.37910(5) | 0.854(8)  |
| N7  | -0.08173(10) | 0.41294(6) | 0.82308(6) | 1.171(10) |
| N8  | 0.07826(10)  | 0.56838(5) | 0.86693(6) | 0.975(9)  |
| N9  | -0.08694(10) | 0.65435(6) | 0.83248(6) | 1.144(9)  |
| N10 | 0.22411(10)  | 0.36464(6) | 0.89802(6) | 1.060(9)  |
| N11 | 0.38617(11)  | 0.40781(6) | 0.93815(6) | 1.285(10) |
| N12 | 0.21910(10)  | 0.56203(6) | 0.58994(6) | 1.086(9)  |
| N13 | 0.50431(10)  | 0.45161(6) | 0.66600(6) | 1.082(9)  |
| N14 | 0.58168(10)  | 0.55629(6) | 0.68928(6) | 1.170(10) |
| N15 | 0.28102(10)  | 0.34834(6) | 0.60146(6) | 1.039(9)  |
| N16 | 0.10129(10)  | 0.34725(6) | 0.55329(6) | 1.012(9)  |
| C1  | 0.30869(10)  | 0.85045(6) | 0.87462(6) | 0.804(9)  |
| C2  | 0.24461(11)  | 1.04648(6) | 0.97082(6) | 0.870(9)  |
| C3  | 0.27913(10)  | 1.04702(6) | 0.77269(6) | 0.821(9)  |
| C4  | 0.27648(10)  | 0.85844(6) | 0.47403(6) | 0.823(9)  |
| C5  | 0.22950(11)  | 1.05539(6) | 0.37244(6) | 0.875(9)  |
| C6  | 0.24546(10)  | 0.86082(6) | 0.28051(6) | 0.781(9)  |

$$B_{eq} = 8/3 \pi^2 (U_{11}(aa^*)^2 + U_{22}(bb^*)^2 + U_{33}(cc^*)^2 + 2U_{12}(aa^*bb^*)\cos \gamma + 2U_{13}(aa^*cc^*)\cos \beta + 2U_{23}(bb^*cc^*)\cos \alpha)$$

**Table S8.** Atomic coordinates and  $B_{\text{iso}}$  involving hydrogen atoms for **4**.

|     | x           | y          | z          | $B_{\text{iso}}$ |
|-----|-------------|------------|------------|------------------|
| H1  | 0.268(2)    | 0.8839(13) | 1.0387(12) | 2.0(3)           |
| H2  | 0.323(2)    | 0.8821(13) | 0.7120(12) | 2.0(3)           |
| H3  | 0.269(2)    | 1.0217(13) | 0.5341(12) | 2.2(3)           |
| H4  | 0.214(2)    | 1.0244(13) | 0.2119(12) | 2.0(3)           |
| H5  | -0.091(2)   | 0.3324(14) | 0.8285(12) | 2.3(3)           |
| H6  | -0.1778(19) | 0.4748(12) | 0.7997(11) | 1.5(2)           |
| H7  | 0.1856(18)  | 0.5898(11) | 0.8873(10) | 1.0(2)           |
| H8  | -0.121(2)   | 0.7186(13) | 0.8817(12) | 2.0(3)           |
| H9  | -0.047(2)   | 0.6889(13) | 0.7606(12) | 2.0(3)           |
| H10 | 0.234(2)    | 0.2827(13) | 0.8871(12) | 1.9(2)           |
| H11 | 0.389(2)    | 0.3831(12) | 1.0135(12) | 1.8(2)           |
| H12 | 0.503(2)    | 0.3671(14) | 0.8993(12) | 2.2(3)           |
| H13 | 0.267(2)    | 0.6337(12) | 0.5875(11) | 1.5(2)           |
| H14 | 0.112(2)    | 0.5608(12) | 0.5580(11) | 1.7(2)           |
| H15 | 0.590(2)    | 0.3832(14) | 0.6596(12) | 2.1(3)           |
| H16 | 0.597(2)    | 0.6042(14) | 0.6253(13) | 2.4(3)           |
| H17 | 0.499(2)    | 0.5995(13) | 0.7435(12) | 1.7(2)           |
| H18 | 0.338(2)    | 0.2793(13) | 0.6385(12) | 2.0(3)           |
| H19 | 0.015(2)    | 0.3230(13) | 0.6079(12) | 2.1(3)           |
| H20 | 0.133(2)    | 0.2867(13) | 0.4998(12) | 1.7(2)           |



**Table S9.** Anisotropic displacement parameters for **4**. The general temperature factor expression:  $\exp(-2\pi^2(a^2U_{11}h^2 + b^2U_{22}k^2 + c^2U_{33}l^2 + 2a*b*U_{12}hk + 2a*c*U_{13}hl + 2b*c*U_{23}kl))$ .

|     | U11       | U22         | U33       | U12          | U13          | U23          |
|-----|-----------|-------------|-----------|--------------|--------------|--------------|
| O1  | 0.0222(3) | 0.00643(19) | 0.0138(2) | -0.00364(17) | -0.00357(19) | -0.00003(16) |
| O2  | 0.0316(3) | 0.0094(2)   | 0.0093(2) | -0.0014(2)   | -0.0035(2)   | -0.00187(17) |
| O3  | 0.0252(3) | 0.0098(2)   | 0.0093(2) | -0.00457(18) | -0.00344(19) | 0.00208(17)  |
| O4  | 0.0284(3) | 0.0108(2)   | 0.0092(2) | -0.00507(19) | -0.0061(2)   | 0.00179(17)  |
| O5  | 0.0325(3) | 0.0071(2)   | 0.0138(3) | -0.00230(19) | -0.0054(2)   | -0.00044(17) |
| O6  | 0.0231(3) | 0.0106(2)   | 0.0095(2) | -0.00573(18) | -0.00430(18) | -0.00140(16) |
| N1  | 0.0201(3) | 0.0074(2)   | 0.0093(3) | -0.00234(19) | -0.0029(2)   | -0.00001(18) |
| N2  | 0.0197(3) | 0.0069(2)   | 0.0084(3) | -0.00268(19) | -0.0029(2)   | 0.00055(18)  |
| N3  | 0.0203(3) | 0.0070(2)   | 0.0080(3) | -0.00322(19) | -0.0027(2)   | -0.00046(18) |
| N4  | 0.0177(3) | 0.0075(2)   | 0.0086(3) | -0.00248(19) | -0.00280(19) | -0.00066(18) |
| N5  | 0.0185(3) | 0.0073(2)   | 0.0088(3) | -0.00219(18) | -0.0042(2)   | 0.00015(18)  |
| N6  | 0.0158(2) | 0.0084(2)   | 0.0089(3) | -0.00316(18) | -0.00316(19) | 0.00020(18)  |
| N7  | 0.0163(3) | 0.0104(2)   | 0.0196(3) | -0.0049(2)   | -0.0051(2)   | -0.0016(2)   |
| N8  | 0.0153(2) | 0.0066(2)   | 0.0162(3) | -0.00247(18) | -0.0051(2)   | 0.00029(19)  |
| N9  | 0.0185(3) | 0.0089(2)   | 0.0157(3) | 0.00046(19)  | -0.0053(2)   | -0.0002(2)   |
| N10 | 0.0170(3) | 0.0080(2)   | 0.0158(3) | -0.00143(19) | -0.0053(2)   | -0.00002(19) |
| N11 | 0.0161(3) | 0.0156(3)   | 0.0179(3) | -0.0021(2)   | -0.0067(2)   | -0.0000(2)   |
| N12 | 0.0182(3) | 0.0085(2)   | 0.0158(3) | -0.00276(19) | -0.0071(2)   | 0.00134(19)  |
| N13 | 0.0138(2) | 0.0099(2)   | 0.0182(3) | -0.00169(19) | -0.0050(2)   | -0.0020(2)   |
| N14 | 0.0169(3) | 0.0128(3)   | 0.0163(3) | -0.0052(2)   | -0.0035(2)   | -0.0029(2)   |
| N15 | 0.0151(2) | 0.0080(2)   | 0.0177(3) | -0.00263(18) | -0.0065(2)   | 0.00099(19)  |
| N16 | 0.0152(3) | 0.0111(2)   | 0.0136(3) | -0.00403(19) | -0.0047(2)   | -0.00042(19) |
| C1  | 0.0135(3) | 0.0077(2)   | 0.0101(3) | -0.00311(19) | -0.0026(2)   | -0.00005(19) |
| C2  | 0.0157(3) | 0.0073(2)   | 0.0101(3) | -0.0015(2)   | -0.0028(2)   | -0.0004(2)   |
| C3  | 0.0143(3) | 0.0074(2)   | 0.0099(3) | -0.00247(19) | -0.0026(2)   | 0.0003(2)    |
| C4  | 0.0137(3) | 0.0088(2)   | 0.0092(3) | -0.0027(2)   | -0.0021(2)   | 0.0001(2)    |
| C5  | 0.0154(3) | 0.0083(3)   | 0.0095(3) | -0.0015(2)   | -0.0024(2)   | -0.0004(2)   |
| C6  | 0.0119(2) | 0.0084(2)   | 0.0099(3) | -0.00259(19) | -0.0026(2)   | -0.0003(2)   |
| C7  | 0.0136(3) | 0.0083(2)   | 0.0088(3) | -0.00304(19) | -0.0008(2)   | -0.00026(19) |
| C8  | 0.0129(3) | 0.0090(2)   | 0.0083(3) | -0.00228(19) | -0.0009(2)   | -0.00019(19) |

**Table S10.** Bond lengths [Å] for **4**.

|             | distance   |             | distance   |
|-------------|------------|-------------|------------|
| O(1)-C(1)   | 1.2296(9)  | N(10)-N(11) | 1.4135(11) |
| O(3)-C(3)   | 1.2495(9)  | N(12)-C(8)  | 1.3204(9)  |
| O(5)-C(5)   | 1.2266(9)  | N(13)-C(8)  | 1.3379(11) |
| N(1)-C(2)   | 1.3475(9)  | N(15)-C(8)  | 1.3388(11) |
| N(2)-C(1)   | 1.3625(10) | N(2)-H(1)   | 0.868(14)  |
| N(3)-C(1)   | 1.3656(9)  | N(4)-H(3)   | 0.890(15)  |
| N(4)-C(4)   | 1.3880(9)  | N(7)-H(5)   | 0.902(16)  |
| N(5)-C(5)   | 1.3659(10) | N(8)-H(7)   | 0.867(13)  |
| N(6)-C(4)   | 1.3482(10) | N(9)-H(9)   | 0.944(14)  |
| N(7)-C(7)   | 1.3314(11) | N(11)-H(11) | 0.924(14)  |
| N(8)-C(7)_  | 1.3303(10) | N(12)-H(13) | 0.906(14)  |
| N(10)-C(7)  | 1.3316(9)  | N(13)-H(15) | 0.853(14)  |
| N(13)-N(14) | 1.4051(11) | N(14)-H(17) | 0.876(13)  |
| N(15)-N(16) | 1.4064(11) | N(16)-H(19) | 0.879(14)  |
| O(2)-C(2))  | 1.2439(10) | N(3)-H(2)   | 0.856(15)  |
| O(4)-C(4)   | 1.2454(9)  | N(5)-H(4)   | 0.875(14)  |
| O(6)-C(6)   | 1.2458(10) | N(7)-H(6)   | 0.906(12)  |
| N(1)-C(3)   | 1.3433(10) | N(9)-H(8)   | 0.909(14)  |
| N(2)-C(2)   | 1.3847(9)  | N(10)-H(10) | 0.906(14)  |
| N(3)-C(3)   | 1.3870(9)  | N(11)-H(12) | 0.899(13)  |
| N(4)-C(5)   | 1.3691(9)  | N(12)-H(14) | 0.860(15)  |
| N(5)-C(6)   | 1.3834(9)  | N(14)-H(16) | 0.911(15)  |
| N(6)-C(6)   | 1.3482(9)  | N(15)-H(18) | 0.908(13)  |
| N(8)-N(9)   | 1.4077(9)  | N(16)-H(20) | 0.912(14)  |

**Table S11.** Bond angles [°] for **4**.

|                  | Angle     |                   | Angle     |
|------------------|-----------|-------------------|-----------|
| C(2)-N(1)-C(3)   | 119.34(6) | C(1)-N(2)-H(1)    | 121.6(10) |
| C(1)-N(3)-C(3)   | 123.55(6) | C(1)-N(3)-H(2)    | 119.2(10) |
| C(5)-N(5)-C(6)   | 123.29(6) | C(4)-N(4)-H(3)    | 115.9(9)  |
| N(9)-N(8)-C(7)   | 118.38(7) | C(5)-N(5)-H(4)    | 120.6(10) |
| N(14)-N(13)-C(8) | 123.84(6) | C(7)-N(7)-H(5)    | 118.9(10) |
| O(1)-C(1)-N(2)   | 122.75(7) | H(5)-N(7)-H(6)    | 125.2(13) |
| N(2)-C(1)-N(3)   | 114.35(6) | C(7)-N(8)-H(7)    | 118.6(7)  |
| O(2)-C(2)-N(2)   | 118.14(6) | N(8)-N(9)-H(9)    | 109.9(8)  |
| O(3)-C(3)-N(1)   | 122.44(6) | N(11)-N(10)-H(10) | 119.9(9)  |
| N(1)-C(3)-N(3)   | 119.52(6) | N(10)-N(11)-H(11) | 108.2(9)  |
| O(4)-C(4)-N(6)   | 122.38(6) | H(11)-N(11)-H(12) | 106.1(12) |
| O(5)-C(5)-N(4)   | 123.10(7) | C(8)-N(12)-H(14)  | 119.5(9)  |
| N(4)-C(5)-N(5)   | 114.41(6) | N(14)-N(13)-H(15) | 116.5(11) |
| O(6)-C(6)-N(6)   | 121.39(6) | N(13)-N(14)-H(16) | 110.8(11) |
| N(7)-C(7)-N(8)   | 119.70(6) | H(16)-N(14)-H(17) | 110.0(12) |
| N(8)-C(7)-N(10)  | 120.09(7) | C(8)-N(15)-H(18)  | 119.9(10) |
| N(12)-C(8)-N(15) | 120.88(7) | N(15)-N(16)-H(20) | 106.7(9)  |
| C(1)-N(2)-C(2)   | 123.30(6) | C(2)-N(2)-H(1)    | 115.2(10) |
| C(4)-N(4)-C(5)   | 123.36(6) | C(3)-N(3)-H(2)    | 117.2(10) |
| C(4)-N(6)-C(6)   | 119.12(6) | C(5)-N(4)-H(3)    | 120.5(9)  |
| N(11)-N(10)-C(7) | 117.70(7) | C(6)-N(5)-H(4)    | 115.9(10) |
| N(16)-N(15)-C(8) | 119.28(6) | C(7)-N(7)-H(6)    | 115.5(9)  |
| O(1)-C(1)-N(3)   | 122.90(7) | N(9)-N(8)-H(7)    | 123.0(7)  |
| O(2)-C(2)-N(1)   | 121.99(6) | N(8)-N(9)-H(8)    | 109.7(9)  |
| N(1)-C(2)-N(2)   | 119.87(6) | H(8)-N(9)-H(9)    | 105.8(12) |
| O(3)-C(3)-N(3)   | 118.03(6) | C(7)-N(10)-H(10)  | 121.8(9)  |
| O(4)-C(4)-N(4)   | 117.93(7) | N(10)-N(11)-H(12) | 106.7(11) |
| N(4)-C(4)-N(6)   | 119.69(6) | C(8)-N(12)-H(13)  | 120.8(8)  |
| O(5)-C(5)-N(5)   | 122.49(7) | H(13)-N(12)-H(14) | 118.1(12) |
| O(6)-C(6)-N(5)   | 118.54(6) | C(8)-N(13)-H(15)  | 116.1(11) |
| N(5)-C(6)-N(6)   | 120.06(6) | N(13)-N(14)-H(17) | 109.9(10) |
| N(7)-C(7)-N(10)  | 120.20(7) | N(16)-N(15)-H(18) | 118.5(10) |
| N(12)-C(8)-N(13) | 122.75(7) | N(15)-N(16)-H(19) | 106.4(10) |
| N(13)-C(8)-N(15) | 116.38(6) | H(19)-N(16)-H(20) | 106.7(13) |

**Table S12.** Torsion Angles[°] for **4**. (Those having bond angles > 160 or < 20 degrees are excluded.)

|                        | Angle      |                        | Angle      |
|------------------------|------------|------------------------|------------|
| C(2)-N(1)-C(3)-O(3)    | 179.68(6)  | C(2)-N(1)-C(3)-N(3)    | -0.91(10)  |
| C(3)-N(1)-C(2)-O(2)    | -178.50(6) | C(3)-N(1)-C(2)-N(2)    | 1.80(10)   |
| C(1)-N(2)-C(2)-O(2)    | 179.96(6)  | C(1)-N(2)-C(2)-N(1)    | -0.33(11)  |
| C(2)-N(2)-C(1)-O(1)    | 178.02(6)  | C(2)-N(2)-C(1)-N(3)    | -1.92(10)  |
| C(1)-N(3)-C(3)-O(3)    | 177.88(6)  | C(1)-N(3)-C(3)-N(1)    | -1.55(10)  |
| C(3)-N(3)-C(1)-O(1)    | -177.08(6) | C(3)-N(3)-C(1)-N(2)    | 2.86(10)   |
| C(4)-N(4)-C(5)-O(5)    | -178.98(6) | C(4)-N(4)-C(5)-N(5)    | 1.14(10)   |
| C(5)-N(4)-C(4)-O(4)    | 178.06(6)  | C(5)-N(4)-C(4)-N(6)    | -1.99(10)  |
| C(5)-N(5)-C(6)-O(6)    | -177.21(6) | C(5)-N(5)-C(6)-N(6)    | 2.33(10)   |
| C(6)-N(5)-C(5)-O(5)    | 178.82(6)  | C(6)-N(5)-C(5)-N(4)    | -1.30(10)  |
| C(4)-N(6)-C(6)-O(6)    | 176.48(6)  | C(4)-N(6)-C(6)-N(5)    | -3.05(9)   |
| C(6)-N(6)-C(4)-O(4)    | -177.17(6) | C(6)-N(6)-C(4)-N(4)    | 2.88(9)    |
| N(9)-N(8)-C(7)-N(7)    | 2.76(10)   | N(9)-N(8)-C(7)-N(10)   | -178.22(5) |
| N(11)-N(10)-C(7)-N(7)  | 179.02(5)  | N(11)-N(10)-C(7)-N(8)  | 0.01(9)    |
| N(14)-N(13)-C(8)-N(12) | -0.54(10)  | N(14)-N(13)-C(8)-N(15) | 179.60(6)  |
| N(16)-N(15)-C(8)-N(12) | -0.67(10)  | N(16)-N(15)-C(8)-N(13) | 179.20(5)  |

**Table S13.** Hydrogen bonds for **4** [Å and °].

| D-H...A                | d(D-H)     | d(H...A)  | d(D...A)  | <(DHA)    |
|------------------------|------------|-----------|-----------|-----------|
| N(2)-H(1) ...O(6)#1    | 2.8104(10) | 0.868(14) | 1.942(14) | 178.2(13) |
| N(3)-H(2) ...O(4)      | 2.8221(11) | 0.856(15) | 1.978(15) | 168.6(13) |
| N(4)-H(3) ...O(3)      | 2.8444(11) | 0.890(15) | 1.955(15) | 177.2(13) |
| N(5)-H(4) ...O(2)#2    | 2.7786(10) | 0.875(14) | 1.905(14) | 175.9(13) |
| N(7)-H(5) ...O(6)#3    | 2.8729(11) | 0.902(16) | 2.052(16) | 150.9(13) |
| N(7)-H(6) ...N(9)      | 2.6609(12) | 0.906(12) | 2.244(14) | 107.5(11) |
| N(7)-H(6) ...N(14)#4   | 3.0843(11) | 0.906(12) | 2.247(13) | 153.5(12) |
| N(8)-H(7) ...O(1)      | 2.8091(11) | 0.867(13) | 2.079(13) | 141.4(10) |
| N(8)-H(7) ...N(9)      | 1.4077(9)  | 0.867(13) | 2.016(12) | 35.8(5)   |
| N(8)-H(7) ...N(11)     | 2.6575(10) | 0.867(13) | 2.298(11) | 105.0(9)  |
| N(9)-H(8) ...O(2)#5    | 2.9400(11) | 0.909(14) | 2.076(14) | 158.2(13) |
| N(9)-H(8) ...N(8)      | 1.4077(9)  | 0.909(14) | 1.916(13) | 43.8(6)   |
| N(9)-H(9) ...N(8)      | 1.4077(9)  | 0.944(14) | 1.944(14) | 42.9(6)   |
| N(10)-H(10) ...N(1)#6  | 2.8133(12) | 0.906(14) | 1.908(14) | 177.6(12) |
| N(10)-H(10) ...N(11)   | 1.4135(11) | 0.906(14) | 2.024(16) | 37.2(7)   |
| N(11)-H(11) ...N(10)   | 1.4135(11) | 0.924(14) | 1.915(15) | 44.5(7)   |
| N(11)-H(12) ...N(10)   | 1.4135(11) | 0.899(13) | 1.881(16) | 46.0(8)   |
| N(12)-H(13) ...O(4)    | 2.8367(12) | 0.906(14) | 1.951(14) | 165.3(12) |
| N(12)-H(13) ...N(14)   | 2.8352(12) | 0.906(14) | 2.563(13) | 98.0(9)   |
| N(12)-H(14) ...N(16)   | 2.7058(12) | 0.860(15) | 2.372(14) | 103.6(10) |
| N(12)-H(14) ...N(16)3# | 2.9212(11) | 0.860(15) | 2.159(14) | 147.5(12) |
| N(13)-H(15) ...N(6)#7  | 2.9004(10) | 0.853(14) | 2.071(14) | 163.7(15) |
| N(13)-H(15) ...N(14)   | 1.4051(11) | 0.853(14) | 1.943(15) | 40.3(8)   |
| N(14)-H(16) ...N(13)   | 1.4051(11) | 0.911(15) | 1.927(16) | 43.0(8)   |
| N(14)-H(17) ...N(13)   | 1.4051(11) | 0.876(13) | 1.893(14) | 44.3(7)   |
| N(15)-H(18) ...O(3)#6  | 2.8441(11) | 0.908(13) | 2.098(15) | 138.8(13) |
| N(15)-H(18) ...N(16)   | 1.4064(11) | 0.908(13) | 2.005(14) | 38.1(7)   |
| N(16)-H(19) ...N(15)   | 1.4064(11) | 0.879(14) | 1.856(15) | 46.6(8)   |
| N(16)-H(20) ...O(5)#6  | 2.9192(11) | 0.912(14) | 2.012(14) | 173.4(13) |
| N(16)-H(20) ...N(15)   | 1.4064(11) | 0.912(14) | 1.883(15) | 45.7(7)   |

Symmetry transformations used to generate equivalent atoms:

#1 x,y,z+1 #2 x,y,z-1 #3 -x,-y+1,-z+1 #4 x-1,y,z #5 -x,-y+2,-z+2 #6 x,y-1,z  
 #7 -x+1,-y+1,-z+1

**Table S14.** Atomic coordinates ( $\times 10^4$ ) and equivalent isotropic displacement parameters ( $\text{\AA}^2 \times 10^3$ ) for  $9 \cdot \text{H}_2\text{O}$ .  $U(\text{eq})$  is defined as one third of the trace of the orthogonalized  $U_{ij}$  tensor.

|      | x       | y       | z       | $U(\text{eq})$ |
|------|---------|---------|---------|----------------|
| O(1) | 4217(3) | 4258(2) | 2780(2) | 27(1)          |
| O(2) | 2959(3) | -627(2) | 4313(2) | 24(1)          |
| O(3) | -899(3) | 3223(2) | 477(2)  | 24(1)          |
| O(4) | 2024(4) | 6054(2) | 5583(2) | 35(1)          |
| N(1) | 3716(4) | 1793(2) | 3516(2) | 22(1)          |
| N(2) | 998(4)  | 1287(2) | 2395(2) | 22(1)          |
| N(3) | 1774(4) | 3757(2) | 1550(2) | 22(1)          |
| N(4) | 4913(4) | 7629(2) | 1083(2) | 26(1)          |
| N(5) | 7660(4) | 6971(2) | 2891(2) | 23(1)          |
| N(6) | 9042(4) | 7741(2) | 3198(2) | 25(1)          |
| N(7) | 8622(4) | 9140(2) | 2250(2) | 24(1)          |
| N(8) | 7003(4) | 9347(2) | 1312(2) | 23(1)          |
| C(1) | 3291(4) | 3333(3) | 2621(3) | 22(1)          |
| C(2) | 2580(4) | 725(3)  | 3458(2) | 21(1)          |
| C(3) | 536(4)  | 2788(2) | 1407(2) | 20(1)          |
| C(4) | 6428(4) | 7970(3) | 1738(2) | 21(1)          |

**Table S15.** Bond lengths [Å] and angles [°] for **9·H<sub>2</sub>O**.

---

|                |            |                |            |
|----------------|------------|----------------|------------|
| O(1)-C(1)      | 1.228(3)   | N(3)-C(3)      | 1.376(3)   |
| O(2)-C(2)      | 1.224(3)   | N(3)-H(2)      | 0.85(3)    |
| O(3)-C(3)      | 1.221(3)   | N(4)-C(4)      | 1.350(3)   |
| O(4)-H(7)      | 0.87(4)    | N(4)-H(4)      | 0.89(4)    |
| O(4)-H(8)      | 0.90(4)    | N(4)-H(5)      | 0.89(3)    |
| N(1)-C(1)      | 1.372(3)   | N(5)-C(4)      | 1.339(3)   |
| N(1)-C(2)      | 1.381(3)   | N(5)-N(6)      | 1.362(2)   |
| N(1)-H(1)      | 0.99(3)    | N(5)-H(6)      | 0.98(4)    |
| N(2)-C(2)      | 1.365(3)   | N(6)-N(7)      | 1.288(3)   |
| N(2)-C(3)      | 1.372(3)   | N(7)-N(8)      | 1.359(3)   |
| N(2)-H(3)      | 0.78(3)    | N(8)-C(4)      | 1.334(3)   |
| N(3)-C(1)      | 1.367(3)   |                |            |
| <hr/>          |            |                |            |
| H(7)-O(4)-H(8) | 112(4)     | N(7)-N(6)-N(5) | 106.31(18) |
| C(1)-N(1)-C(2) | 124.4(2)   | N(6)-N(7)-N(8) | 111.78(17) |
| C(1)-N(1)-H(1) | 117.5(18)  | C(4)-N(8)-N(7) | 105.05(18) |
| C(2)-N(1)-H(1) | 118.0(18)  | O(1)-C(1)-N(3) | 122.7(2)   |
| C(2)-N(2)-C(3) | 124.68(19) | O(1)-C(1)-N(1) | 121.9(2)   |
| C(2)-N(2)-H(3) | 119(2)     | N(3)-C(1)-N(1) | 115.38(19) |
| C(3)-N(2)-H(3) | 116(2)     | O(2)-C(2)-N(2) | 122.71(19) |
| C(1)-N(3)-C(3) | 124.58(19) | O(2)-C(2)-N(1) | 121.9(2)   |
| C(1)-N(3)-H(2) | 123(2)     | N(2)-C(2)-N(1) | 115.4(2)   |
| C(3)-N(3)-H(2) | 112(2)     | O(3)-C(3)-N(2) | 121.67(19) |
| C(4)-N(4)-H(4) | 114(2)     | O(3)-C(3)-N(3) | 122.9(2)   |
| C(4)-N(4)-H(5) | 121.4(19)  | N(2)-C(3)-N(3) | 115.40(18) |
| H(4)-N(4)-H(5) | 122(3)     | N(8)-C(4)-N(5) | 108.88(19) |
| C(4)-N(5)-N(6) | 107.99(18) | N(8)-C(4)-N(4) | 125.4(2)   |
| C(4)-N(5)-H(6) | 133(2)     | N(5)-C(4)-N(4) | 125.6(2)   |
| N(6)-N(5)-H(6) | 119(2)     |                |            |

---

**Table S16.** Anisotropic displacement parameters ( $\text{\AA}^2 \times 10^3$ ) for **9-H<sub>2</sub>O**. The anisotropic displacement factor exponent takes the form:  $-2\pi^2 [ h^2a^{*2} U_{11} + \dots + 2hka^*b^*U_{12} ]$ .

|      | U11   | U22   | U33   | U23   | U13    | U12    |
|------|-------|-------|-------|-------|--------|--------|
| O(1) | 39(1) | 18(1) | 35(1) | -7(1) | -15(1) | -16(1) |
| O(2) | 32(1) | 12(1) | 30(1) | -2(1) | -12(1) | -12(1) |
| O(3) | 31(1) | 17(1) | 30(1) | -5(1) | -14(1) | -12(1) |
| O(4) | 45(1) | 19(1) | 48(1) | 1(1)  | -25(1) | -21(1) |
| N(1) | 30(1) | 16(1) | 30(1) | -6(1) | -14(1) | -13(1) |
| N(2) | 30(1) | 16(1) | 29(1) | -6(1) | -12(1) | -13(1) |
| N(3) | 33(1) | 12(1) | 29(1) | -3(1) | -15(1) | -13(1) |
| N(4) | 35(1) | 18(1) | 34(1) | -6(1) | -12(1) | -17(1) |
| N(5) | 31(1) | 14(1) | 30(1) | -6(1) | -11(1) | -14(1) |
| N(6) | 31(1) | 18(1) | 32(1) | -7(1) | -12(1) | -13(1) |
| N(7) | 30(1) | 18(1) | 33(1) | -7(1) | -11(1) | -14(1) |
| N(8) | 30(1) | 15(1) | 31(1) | -6(1) | -11(1) | -13(1) |
| C(1) | 28(1) | 17(1) | 29(1) | -9(1) | -9(1)  | -11(1) |
| C(2) | 26(1) | 18(1) | 26(1) | -7(1) | -7(1)  | -13(1) |
| C(3) | 27(1) | 15(1) | 25(1) | -7(1) | -6(1)  | -11(1) |
| C(4) | 27(1) | 16(1) | 25(1) | -7(1) | -5(1)  | -13(1) |

**Table S17.** Hydrogen coordinates ( $\times 10^4$ ) and isotropic displacement parameters ( $\text{\AA}^2 \times 10^3$ ) for **9-H<sub>2</sub>O**.

|      | x        | y        | z        | U(eq)  |
|------|----------|----------|----------|--------|
| H(1) | 4810(50) | 1450(30) | 4300(30) | 31(7)  |
| H(2) | 1410(50) | 4670(40) | 930(30)  | 32(7)  |
| H(3) | 300(50)  | 740(40)  | 2330(30) | 22(6)  |
| H(4) | 4460(60) | 6720(40) | 1620(40) | 33(7)  |
| H(5) | 4030(50) | 8360(30) | 370(30)  | 18(6)  |
| H(6) | 7710(60) | 5880(50) | 3490(40) | 45(9)  |
| H(7) | 1470(70) | 6700(50) | 4750(40) | 49(10) |
| H(8) | 3320(70) | 6320(50) | 5770(40) | 55(10) |



**Table S18.** Torsion angles [°] for **9·H<sub>2</sub>O**.

|                     |           |
|---------------------|-----------|
| C(4)-N(5)-N(6)-N(7) | -0.1(3)   |
| N(5)-N(6)-N(7)-N(8) | 0.0(3)    |
| N(6)-N(7)-N(8)-C(4) | 0.0(2)    |
| C(3)-N(3)-C(1)-O(1) | -174.7(2) |
| C(3)-N(3)-C(1)-N(1) | 5.3(3)    |
| C(2)-N(1)-C(1)-O(1) | 175.2(2)  |
| C(2)-N(1)-C(1)-N(3) | -4.8(3)   |
| C(3)-N(2)-C(2)-O(2) | -179.4(2) |
| C(3)-N(2)-C(2)-N(1) | 1.1(3)    |
| C(1)-N(1)-C(2)-O(2) | -177.6(2) |
| C(1)-N(1)-C(2)-N(2) | 1.8(3)    |
| C(2)-N(2)-C(3)-O(3) | 179.9(2)  |
| C(2)-N(2)-C(3)-N(3) | -0.7(3)   |
| C(1)-N(3)-C(3)-O(3) | 176.7(2)  |
| C(1)-N(3)-C(3)-N(2) | -2.7(3)   |
| N(7)-N(8)-C(4)-N(5) | -0.1(2)   |
| N(7)-N(8)-C(4)-N(4) | -178.2(2) |
| N(6)-N(5)-C(4)-N(8) | 0.1(3)    |
| N(6)-N(5)-C(4)-N(4) | 178.2(2)  |

**Table S19.** Hydrogen bonds for **9·H<sub>2</sub>O** [Å and °].

| D-H...A            | d(D-H)  | d(H...A) | d(D...A) | <(DHA) |
|--------------------|---------|----------|----------|--------|
| N(1)-H(1)...O(2)#1 | 0.99(3) | 1.84(3)  | 2.823(3) | 174(3) |
| N(3)-H(2)...O(3)#2 | 0.85(3) | 1.93(3)  | 2.772(3) | 174(3) |
| N(2)-H(3)...N(7)#3 | 0.78(3) | 2.05(4)  | 2.825(3) | 176(3) |
| N(4)-H(4)...O(1)   | 0.89(4) | 2.22(4)  | 3.097(3) | 168(3) |
| N(4)-H(5)...N(8)#4 | 0.89(3) | 2.18(3)  | 3.011(3) | 156(2) |
| N(5)-H(6)...O(4)#5 | 0.98(4) | 1.69(4)  | 2.668(3) | 175(3) |
| O(4)-H(7)...N(6)#6 | 0.87(4) | 2.03(4)  | 2.849(3) | 157(3) |
| O(4)-H(8)...O(1)#5 | 0.90(4) | 2.02(4)  | 2.803(3) | 145(3) |

Symmetry transformations used to generate equivalent atoms:

#1 -x+1,-y,-z+1    #2 -x,-y+1,-z    #3 x-1,y-1,z    #4 -x+1,-y+2,-z    #5 -x+1,-y+1,-z+1    #6 x-1,y,z

**Table S20.** Crystal data and structure refinement for CA·H<sub>2</sub>O.

|                                             | CA·H <sub>2</sub> O                                         |
|---------------------------------------------|-------------------------------------------------------------|
| Formula                                     | C <sub>3</sub> H <sub>7</sub> N <sub>3</sub> O <sub>5</sub> |
| M(g/mol)                                    | 165.12                                                      |
| Crystal Color                               | colorless                                                   |
| Crystal System                              | Monoclinic                                                  |
| Space Group                                 | C2/c                                                        |
| a [Å]                                       | 12.312(3)                                                   |
| b [Å]                                       | 6.7174(14)                                                  |
| c [Å]                                       | 8.707(2)                                                    |
| α [°]                                       | 90                                                          |
| β [°]                                       | 115.09(2)                                                   |
| γ [°]                                       | 90                                                          |
| V [Å <sup>3</sup> ]                         | 652.2(3)                                                    |
| Z                                           | 4                                                           |
| T [k]                                       | 123                                                         |
| λ [Å]                                       | 0.71075                                                     |
| ρ <sub>calcd</sub> [g/cm <sup>-3</sup> ]    | 1.82                                                        |
| μ [mm <sup>-1</sup> ]                       | 0.160                                                       |
| F (000)                                     | 344                                                         |
| crystal size [mm <sup>3</sup> ]             | 0.220×0.200×0.180                                           |
| ϑ <sub>max</sub> [°]                        | 27.840                                                      |
| No. Refl. collected                         | 3576                                                        |
| No. Indep. reflections                      | 778                                                         |
| [R <sub>int</sub> ]                         | 0.0898                                                      |
| GOF <sup>[a]</sup> on F <sup>2</sup>        | 0.954                                                       |
| R <sub>1</sub> <sup>[b]</sup> [I > 2σ(I)]   | 0.05654                                                     |
| w R <sub>2</sub> <sup>[c]</sup> [All refl.] | 0.1360                                                      |

Crystal of CA·H<sub>2</sub>O was obtained when we cultured the crystal salt **5** by slow evaporation from water solution at room temperature and normal pressure. Its CCDC number is 1447126.

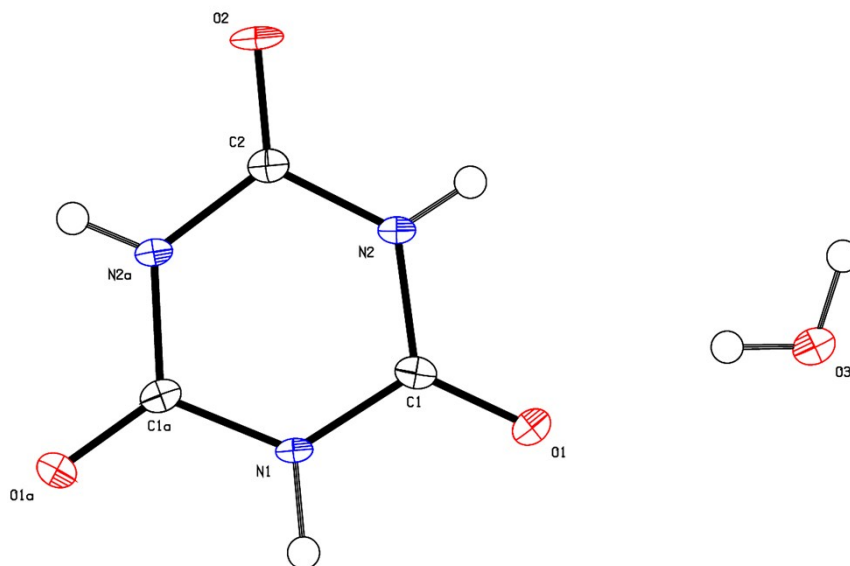

**Figure S1** Molecular structure of CA·H<sub>2</sub>O. Ellipsoids are drawn at the 50% probability level.

**Table S21.** Atomic coordinates ( $\times 10^4$ ) and equivalent isotropic displacement parameters ( $\text{\AA}^2 \times 10^3$ ) for CA·H<sub>2</sub>O.  $U(\text{eq})$  is defined as one third of the trace of the orthogonalized  $U_{ij}$  tensor.

|      | x       | y       | z       | U(eq) |
|------|---------|---------|---------|-------|
| O(1) | 3607(1) | 950(2)  | 4738(2) | 21(1) |
| O(2) | 5000    | 6818(3) | 7500    | 32(1) |
| O(3) | 1966(2) | 1728(3) | 1371(2) | 24(1) |
| N(1) | 5000    | 924(4)  | 7500    | 14(1) |
| N(2) | 4285(2) | 3914(3) | 6088(2) | 16(1) |
| C(1) | 4250(2) | 1870(3) | 6017(3) | 15(1) |
| C(2) | 5000    | 4995(5) | 7500    | 19(1) |

**Table S22.** Bond lengths [ $\text{\AA}$ ] and angles [ $^\circ$ ] for CA·H<sub>2</sub>O.

|             |          |                  |            |
|-------------|----------|------------------|------------|
| O(1)-C(1)   | 1.225(3) | H(1)-O(3)-H(4)   | 106(3)     |
| O(2)-C(2)   | 1.225(4) | C(1)#1-N(1)-C(1) | 125.3(3)   |
| O(3)-H(1)   | 0.85(4)  | C(1)#1-N(1)-H(3) | 117.36(13) |
| O(3)-H(4)   | 0.92(5)  | C(1)-N(1)-H(3)   | 117.36(13) |
| N(1)-C(1)#1 | 1.383(2) | C(1)-N(2)-C(2)   | 124.3(2)   |
| N(1)-C(1)   | 1.383(2) | C(1)-N(2)-H(2)   | 115(2)     |
| N(1)-H(3)   | 0.98(4)  | C(2)-N(2)-H(2)   | 120(2)     |
| N(2)-C(1)   | 1.374(3) | O(1)-C(1)-N(2)   | 122.7(2)   |
| N(2)-C(2)   | 1.377(3) | O(1)-C(1)-N(1)   | 122.3(2)   |
| N(2)-H(2)   | 0.85(4)  | N(2)-C(1)-N(1)   | 114.9(2)   |
| C(2)-N(2)#1 | 1.377(3) | O(2)-C(2)-N(2)#1 | 121.82(13) |
|             |          | O(2)-C(2)-N(2)   | 121.82(13) |
|             |          | N(2)#1-C(2)-N(2) | 116.4(3)   |

Symmetry transformations used to generate equivalent atoms:

$$\#1 -x+1, y, -z+3/2$$

**Table S22.** Anisotropic displacement parameters ( $\text{\AA}^2 \times 10^3$ ) for CA·H<sub>2</sub>O. The anisotropic displacement factor exponent takes the form:  $-2\pi^2 [h^2a^2 U_{11} + \dots + 2hka^*b^*U_{12}]$ .

|      | U11   | U22   | U33   | U23   | U13  |
|------|-------|-------|-------|-------|------|
| O(1) | 26(1) | 12(1) | 17(1) | -2(1) | 1(1) |
| O(2) | 49(2) | 5(1)  | 30(2) | 0     | 5(1) |
| O(3) | 30(1) | 13(1) | 20(1) | -2(1) | 2(1) |
| N(1) | 19(1) | 6(1)  | 14(1) | 0     | 4(1) |
| N(2) | 21(1) | 7(1)  | 15(1) | 1(1)  | 3(1) |
| C(1) | 18(1) | 10(1) | 17(1) | 2(1)  | 7(1) |
| C(2) | 25(2) | 11(2) | 17(2) | 0     | 5(1) |

**Table S23.** Hydrogen coordinates ( $\times 10^4$ ) and isotropic displacement parameters ( $\text{\AA}^2 \times 10^3$ ) for CA·H<sub>2</sub>O.

|      | x        | y        | z        | U(eq)   |
|------|----------|----------|----------|---------|
| H(1) | 2570(40) | 1830(60) | 2320(60) | 98(16)  |
| H(2) | 3790(30) | 4500(50) | 5210(40) | 49(9)   |
| H(3) | 5000     | -540(60) | 7500     | 16(8)   |
| H(4) | 1850(30) | 2970(80) | 890(50)  | 107(16) |

**Table S24.** Torsion angles [ $^\circ$ ] for CA·H<sub>2</sub>O.

|                       |             |
|-----------------------|-------------|
| C(2)-N(2)-C(1)-O(1)   | -179.65(17) |
| C(2)-N(2)-C(1)-N(1)   | 0.0(2)      |
| C(1)#1-N(1)-C(1)-O(1) | 179.7(2)    |
| C(1)#1-N(1)-C(1)-N(2) | -0.02(11)   |
| C(1)-N(2)-C(2)-O(2)   | 179.98(13)  |
| C(1)-N(2)-C(2)-N(2)#1 | -0.02(13)   |

Symmetry transformations used to generate equivalent atoms:

#1  $-x+1, y, -z+3/2$

## Computational Details

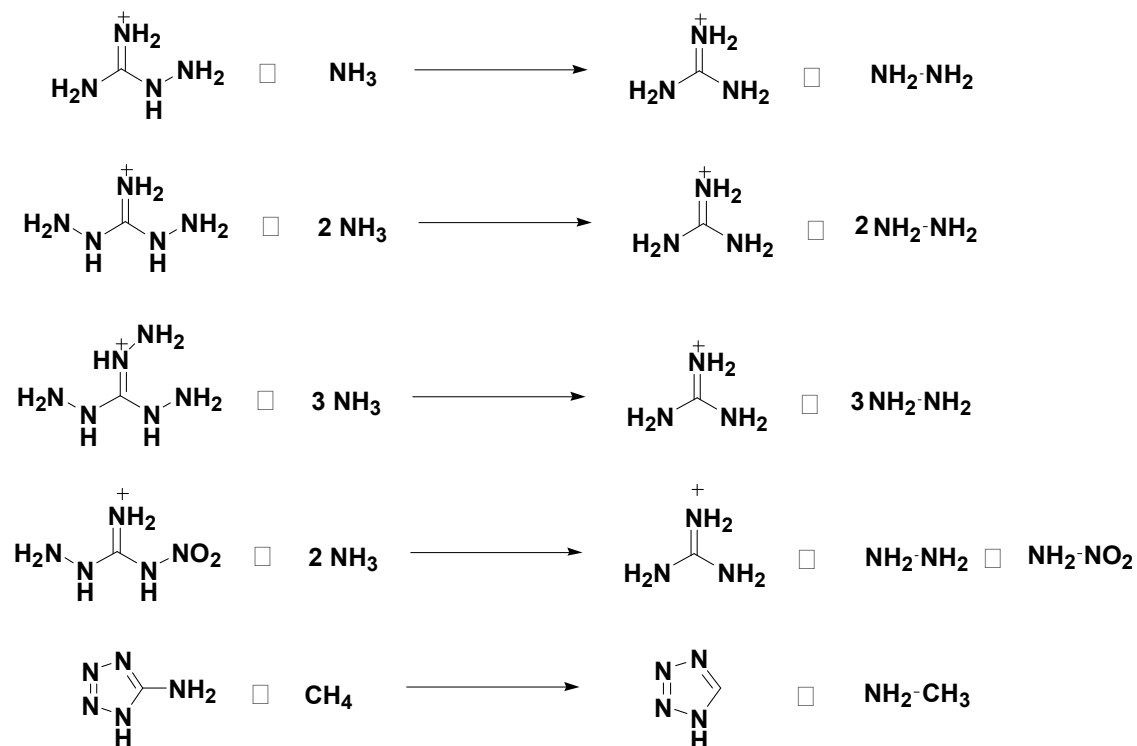

**Scheme S1.** Isodesmic reactions for **2**, **4,5** and **6** cations and 5-amino-1*H*-tetrazole

Fig. S2  $^{13}\text{C}$  NMR spectra of salt 1

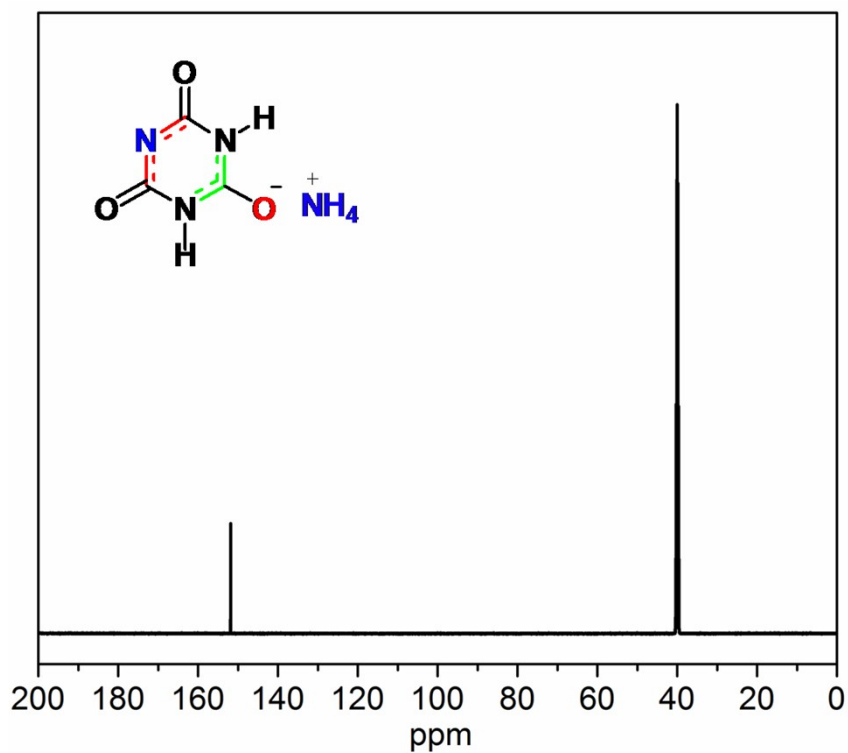

In the  $^{13}\text{C}$  NMR spectra, a single peak ( $\sim 152$  ppm) is due to the anion, indicating the anion ring tautomerism.

Fig. S3  $^{13}\text{C}$  NMR spectra of salt 6.

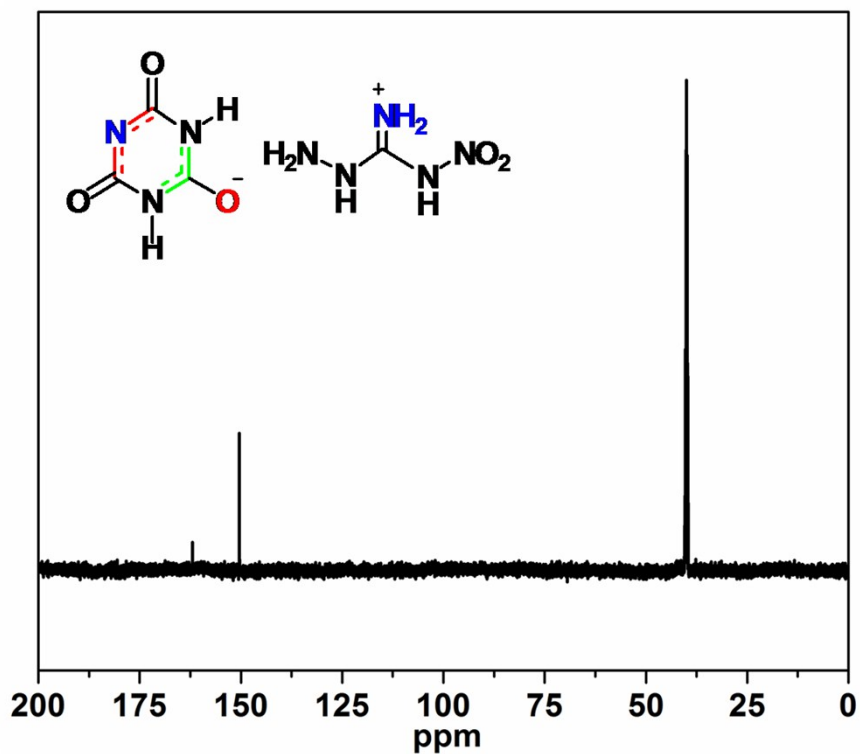

In the  $^{13}\text{C}$  NMR spectra, there are two signals ( $\sim 150$  ppm and  $\sim 162$  ppm). single peak at 150 ppm is due to the anion, and the other one at 162 ppm is associated with the cation.
